# Supplementary material
Source: PubMed Central journal article supplement (PMC3032066)
Supplement: mmc1.pdf [file mmc1.pdf]

## Haploinsufficiency of TAB2 Causes

### Congenital Heart Defects in Humans

Bernard Thienpont, Litu Zhang, Alex V. Postma, Jeroen Breckpot, Léon-Charles Tranchevent, Peter Van Loo, Kjeld Møllgård, Niels Tommerup, Iben Bache, Zeynep Tümer, Klaartje van Engelen, Björn Menten, Geert Mortier, Darrel Waggoner, Marc Gewillig, Yves Moreau, Koen Devriendt, and Lars Allan Larsen

#### SUPPLEMENTAL FIGURES

**Figure S1. Representation of Spearman Rank Correlations between Data Sources upon Prioritization, Here Using the Vascularisation Training Set**

The Cis-regulatory modules (Cr) data source is not strongly correlated with any other source, while the Textmining (Te) and the Gene Ontology (Go) data source, or both micro-array expression analysis data sources for adult human tissues (Sy and So) are strongly correlated. All data sources are perfectly correlated with themselves.

*Legend:* Go: GeneOntology, Sw: Swissprot, Ip: Interpro, Ke: Kegg, Es: EnsemblEst, Bi: Bind, St: String, Su: SuEtAl, So: Son et al microarray expression, Ch: microarray expression developing heart (GEO GSE1479), Ho: Homologene, Ma: Biomart, In: Inparanoid, Sy: Shyamsundar et al microarray expression, Cl: Clark et al microarray expression, Mo: Motif, Cr: CisRegModule, Bl: Blast, Tx: Text, Ou: Ouzounis, Pr: Prospectr,

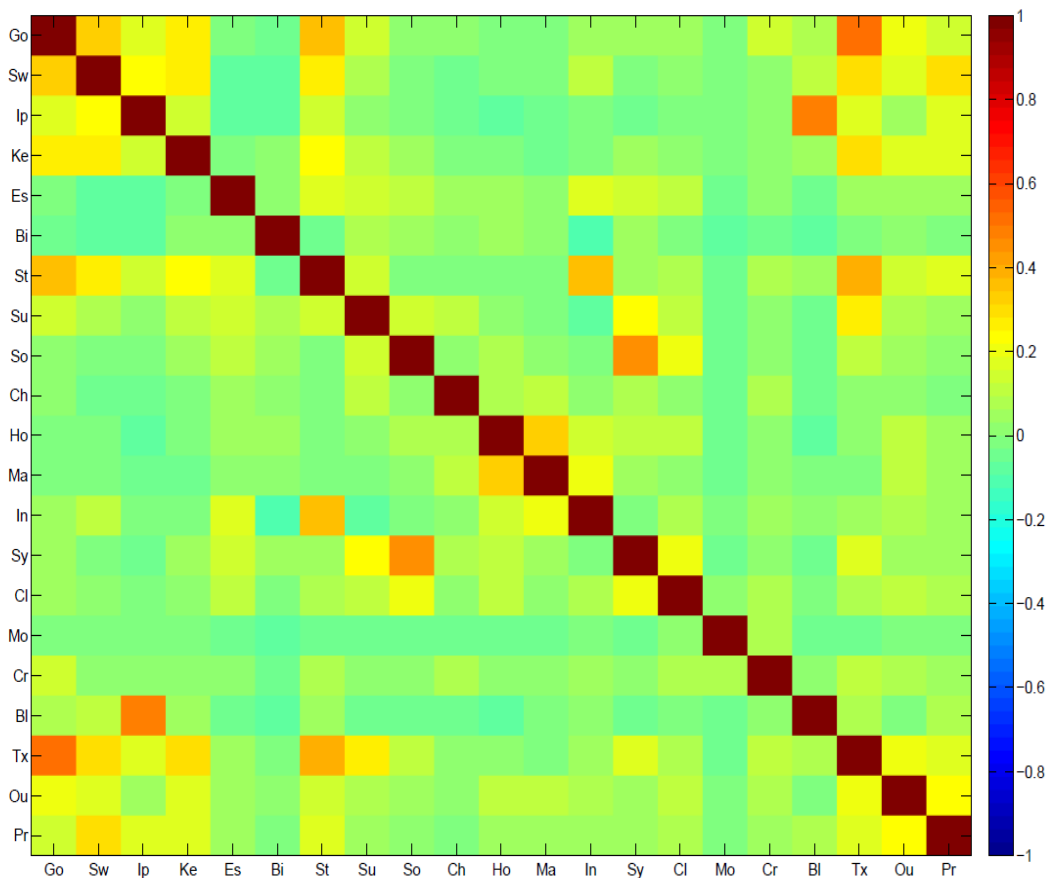

**Figure S2. Performance of the Different Data Sources for Prioritization as Assessed by Leave-One-Out Cross-Validations (LOOCV)**

Performance measures displayed are the area under the ROC curve of the LOOCV (specificity/sensitivity plot). Performance of the data source in prioritizations depends on the training set. For example: the chdma (microarray expression data for heart development) is highly informative for first heart field and the neural crest cells, but performs poorly for the other training sets. Similarly, Gene Ontology does not contain information to significantly prioritize genes involved in valve formation, while it does contribute to prioritizations according to the other training sets. Information on the standard data sources can be found on the [Endeavour website](#), other data sources are as described in the main text. Similar LOOCV results have been used to decide which data sources were excluded from prioritization (LOOCV <0.6; striped boxes).

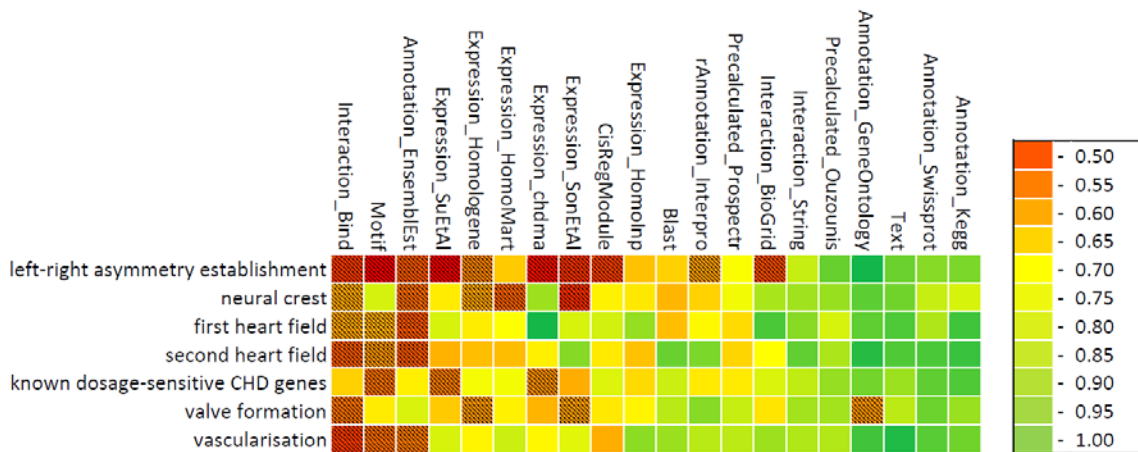

**Figure S3. Mapping of Translocation Breakpoints of Family N**

The top 5 ranking genes after prioritizations of all 106 genes on 6q24q25 using the adapted Endeavour and training genes involved in different processes of cardiac development, as indicated on top. LR = left-right; HF = heart field. Final = result upon combining individual prioritizations.

| rank | final   | vasculogenesis | neural crest | valve formation | LR asymmetry establishment | first HF  | second HF | human CHDs |
|------|---------|----------------|--------------|-----------------|----------------------------|-----------|-----------|------------|
|      |         |                |              |                 |                            |           |           |            |
| 1    | TAB2    | GPR126         | CITED2       | TAB2            | CITED2                     | HIVE P2   | HIVE P2   | TAB2       |
| 2    | HIVE P2 | UTRN           | TAB2         | UTRN            | IGF2R                      | PPP1 R14C | FBX O30   | GTF 2H5    |
| 3    | CITED 2 | IGF2 R         | FBX O30      | HIVE P2         | GRM1                       | TXLNB     | PPP1 R14C | GRM1       |
| 4    | GRM1    | CITED2         | GRM1         | ZBTB2           | MTRF 1L                    | OPRM 1    | TXLNB     | HIVE P2    |
| 5    | FBX O30 | TAB2           | HIVE P2      | PEX3            | FBX O30                    | GPR12 6   | OPRM 1    | HECA       |

### Figure S4. Mapping of Translocation Breakpoints of Family N

**(A)** Breakpoint on chromosome 2 as determined by two breakpoint spanning fosmid probes, G248P8673B4 and G248P8684C9. This breakpoint is within the POTE ankyrin domain family, member E (POTEE) gene. This gene is variable in copy number as described by the several independent reports in the Database of Genomic Variants. **(B)** Breakpoint on chromosome 6 as determined by the breakpoint spanning fosmid probe G248P8912A2. FISH moreover showed a proximal position of the probes AL031056 and G248P8121B5 and a distal position of the probes RP11-455K21 and G248P82418C3 compared to the breakpoint, thus indicating that the breakpoint lies within a 17 kb region at chromosome position 149,678,240-149,695,219, within the first intron or the promoter region of TAB2.

Depicted Database of Genomic Variants entries:

3393: Pub Med ID: 17122850; Sample Size: 270 control samples (HapMap); Total Gain/Loss: 121

2409: Pub Med ID: 17122850; Sample Size: 270 control samples (HapMap); Observed Gain: 4; Observed Loss: 4

32374: Pub Med ID: 18304495; Sample Size: 30 control samples (HapMap); Observed Gain: 0; Observed Loss: 20

8388: Pub Med ID: 17911159; Sample Size: 776 control samples (506 Germans, 270 HapMap); Observed Gain: 1

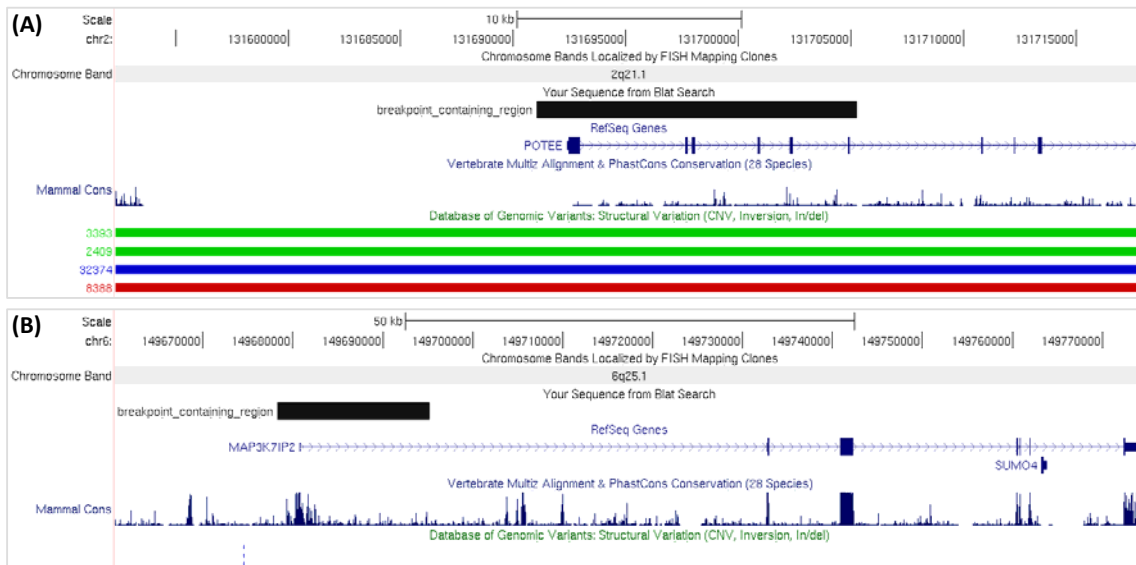

TABLE S1. PHENOTYPES ASSOCIATED WITH DELETIONS IN 6Q24 OR 6Q25

| ref <sup>a</sup> | breakpoint regions on chromosome 6 (Mb) |               | heart defect                                                         | develop-mental delay | micro-ceph | IUGR | PNGR | CNS | oral   | phenotypic features                                 |          |                                                                                                                                                                                                                                   | CHD Wiki case report |
|------------------|-----------------------------------------|---------------|----------------------------------------------------------------------|----------------------|------------|------|------|-----|--------|-----------------------------------------------------|----------|-----------------------------------------------------------------------------------------------------------------------------------------------------------------------------------------------------------------------------------|----------------------|
|                  | proximal                                | Distal        |                                                                      |                      |            |      |      |     |        | eye                                                 | hearing  | Dysmorphism                                                                                                                                                                                                                       |                      |
| A *              | 143.72-143.74                           | 150.21-150.22 | hypopl AoA, CoAo, VSD                                                | mild-mod             | ?          | Y    | Y    | nl  | nl     | strabism                                            | /        | hypospadias, epicanthic folds, micrognathia, small ears                                                                                                                                                                           | 439                  |
| B *,I1           | 142.34-142.35                           | 152.48-152.49 | tricuspid & pulmonic valve dyspl, mvp, premature ventr. contractions | mild                 | N          | Y    | Y    | nl  | nl     | astigmatism                                         | /        | frontal bossing, bitemporal narrowing, PF short & slant up, hooded eyelids, sparse eyelashes, infraorbital folds, anteverted nares, thin upper lip, fetal pads (hands), low set dyspl ears                                        | 464                  |
| C *,I2           | 146.17-146.18                           | 156.55-156.59 | ASD-II                                                               | mild                 | N          | Y    | Y    | /   | nl     | retinal pigment changes, minimal optic nerve hypopl | /        | sacral dimple, narrow thorax, frontal bossing, bitemporal narrowing, PF short & slant up, sparse eyelashes, infraorbital folds, anteverted nares, thin upper lip, flat long philtrum, low posterior hair line, low set dyspl ears | 465                  |
| D II             | 148.70-148.78                           | 151.38-151.35 | tricuspid insufficiency, ASD, PDA                                    | mild                 | N          | N    | Y    | nl  | HP     | nl                                                  | nl       | facial asymmetry, short PF, medial flare eyebrows, anteverted nares, thin upper lip, long & smooth philtrum, sandal gap, cupshaped left ear                                                                                       | 400                  |
| E III1           | 149.09-149.23                           | 156.06-156.30 | VSD                                                                  | mild                 | /          | N    | Y    | /   | nl     | /                                                   | /        | short nose, full cheeks, smooth philtrum, thin upper lip, almond eyes, low set protruding ears, dyspl left ear                                                                                                                    | 399                  |
| F <sub>p</sub> * | 148.79-148.84                           | 150.78-151.16 | centrovalvular insufficiency of aortic & pulmonic valve              | N                    | Y          | N    | Y    | /   | /      | /                                                   | /        | phimosis; high forehead; almond-shaped, upslanting palpebral fissures; midface hypopl; micrognathia; large, normally placed ears                                                                                                  | 462                  |
| F <sub>m</sub>   |                                         |               | mild aortic & mitral valve stenosis, sinus tachycardia               | N                    | /          | /    | Y    | /   | /      | /                                                   | /        | facial features similar to her son (Fp)                                                                                                                                                                                           | 463                  |
| G IV             |                                         |               | N                                                                    | /                    | /          | /    | /    | nl  | CLP    | /                                                   | /        | /                                                                                                                                                                                                                                 |                      |
| H V3             | 149.95-149.96                           | 160.27-160.28 | N                                                                    | Y                    | Y          | N    | Y    | Acc | HP, BU | /                                                   | mild cHL | midface hypopl, clinodact 5, plagiocephaly, low set, posteriorly roated ears                                                                                                                                                      |                      |
| I *,I3           | 140.33-140.35                           | 146.47-146.48 | N                                                                    | N                    | N          | Y    | Y    | NI  | nl     | /                                                   | nl       | N                                                                                                                                                                                                                                 |                      |
| J VI             | 151.16-152.37                           | 157.79-158.68 | N                                                                    | mild-mod             | Y          | N    | Y    | Acc | CHP    | nystagmus                                           | /        | dolichocephaly, anteriorly placed anus, low set ears                                                                                                                                                                              |                      |
| K V1             | 155.09                                  | 158.87-158.88 | N                                                                    | Y                    | Y          | N    | N    | /   | N      | N                                                   | snHL     | long philtrum, micrognathia, PF slant down, epicanthus, low set ears                                                                                                                                                              |                      |

<sup>a</sup> \*: this report; I:Nowaczyk<sup>1</sup>; II: Caselli<sup>2</sup>; III: Bisgaard<sup>3</sup>; IV: Osoegawa<sup>4</sup>; V: Nagamani<sup>4,5</sup>; VI: Pirola<sup>6</sup>. CHDWiki case reports are accessible through [homes.esat.kuleuven.be/~bioiuser/chdwiki](https://homes.esat.kuleuven.be/~bioiuser/chdwiki)

Acc = Agenesis of the corpus callosum, AoA = aortic arch, AoS = aortic stenosis, ASD = atrial septal defect, BU = bifid uvula, cHL = conductive hearing loss, CHP = cleft and high palate, CLP = cleft lip and palate, CNS = Central nervous system, CoAo = coarctation of the aorta, dyspl = dysplastic, G<sub>p</sub> = proband of family G, G<sub>m</sub> = mother of G<sub>p</sub>, HP = high palate, hypopl = hypoplasia, IUGR = intra-uterine growth retardation, LS = low-set, mod = moderate, mvp = mitral valve prolapse, N = no, nl = normal, PNGR = post-natal growth retardation, SNHL = sensorineural hearing loss, PDA = patent ductus arteriosus, PF = palpebral fissures, VSD = ventricular septal defect, Y = yes, / = not available.

TABLE S2. PATIENT POPULATION SCREENED FOR *TAB2* MUTATIONS

| n                                                                                             | CHD                                           |
|-----------------------------------------------------------------------------------------------|-----------------------------------------------|
| <b><u>Patients from the CONCOR national registry database and DNA-bank</u></b>                |                                               |
| 18                                                                                            | Aortic stenosis                               |
| 4                                                                                             | Subaortic stenosis                            |
| 74                                                                                            | Subaortic stenosis due to fibromuscular shelf |
| 13                                                                                            | Aortic valvar abnormality                     |
| 62                                                                                            | Congenital aortic valvar stenosis             |
| 42                                                                                            | Congenital aortic regurgitation               |
| 62                                                                                            | Bicuspid aortic valve                         |
| 11                                                                                            | Ascending aorta abnormality                   |
| 1                                                                                             | Ascending aorta hypoplasia                    |
| 18                                                                                            | Supravalvar aortic stenosis                   |
| 26                                                                                            | Ascending aorta dilation                      |
| <b>331 heart defects in total, found in 282 unique patients</b>                               |                                               |
| <b><u>Patients from the paediatric cardiology unit of the University Hospitals Leuven</u></b> |                                               |
| 25                                                                                            | Aortic stenosis                               |
| 42                                                                                            | Pulmonic stenosis                             |
| 24                                                                                            | Aortic coarctation                            |
| 11                                                                                            | Atrial septal defect                          |
| 30                                                                                            | Ventricular septal defect                     |
| 58                                                                                            | Tetralogy of Fallot                           |
| 4                                                                                             | Univentricular heart                          |
| <b>194 heart defects in total, found in 126 unique patients</b>                               |                                               |

The patients from these patient populations were not analyzed systematically by aCGH.

TABLE S3. OLIGONUCLEOTIDE PRIMERS USED FOR TAB2 SEQUENCING

| <b>name</b>      | <b>Forward (5'→3')</b>        | <b>Reverse (5'→3')</b>        |
|------------------|-------------------------------|-------------------------------|
| <b>Exon1</b>     | GTTTTTGATCTGCTGCAGCC          | GCTCGATTCCAATGAAGCTC          |
| <b>Exon1_alt</b> | GAGGCACATGTGAAGATTGG          | GGCTGTTTTGAGAGATGGAATAC       |
| <b>Exon2</b>     | GCTAAAGCACATATTCTTTTGTACTGA   | AACAAGAAGATAACCTAAAAGAGTTTTTC |
| <b>Exon2_alt</b> | GAGACCCATTTTCCCTTCAG          | AAACTCAATACTAGCTGCATGTTACC    |
| <b>Exon3a</b>    | GCCAGTCACTTGGTAATCATGTATT     | TGTAGACATGAGAGGTCTGGTG        |
| <b>Exon3b</b>    | GCCCCAAATATCCAGACTGG          | GGCAGAAGACTGTGAGCTACC         |
| <b>Exon3c</b>    | GCCCCAAATATCCAGACTGG          | GTGAAATCAAATGCACACCAAC        |
| <b>Exon4</b>     | GTTTTAATAAGCAACTAGTTGACTCTCTT | GGCAGAGTGGTATGGTCAC           |
| <b>Exon5</b>     | GTTTGCTTTTCCAAGTCTGCTTA       | CCACAGAAAACTGCTGGTG           |
| <b>Exon6</b>     | GTTTTTGAGCTATAAGCATTGATATATT  | TCTAGAGAGGAAGGTTGCTGAAC       |
| <b>Exon7</b>     | GGTGTTTAAAGTTGCCTGTAATTTT     | CCTCCTGTCAAATTCAGTAGTGAC      |

TABLE S4. RESULTS OF ENDEAVOUR PRIORITISATION

| rank | Ensembl ID      | name        | description                                                                                     | p-value  | genome-wide rank |
|------|-----------------|-------------|-------------------------------------------------------------------------------------------------|----------|------------------|
| 1    | ENSG00000055208 | MAP3K7IP2   | Mitogen-activated protein kinase kinase kinase 7-interacting protein 2 (TAK1-binding protein 2) | 4.17E-07 | 44               |
| 2    | ENSG00000010818 | HIVEP2      | Human immunodeficiency virus type 1 enhancer-binding protein 2                                  | 1.19E-05 | 190              |
| 3    | ENSG00000164442 | CITED2      | Cbp/p300-interacting transactivator 2                                                           | 1.62E-05 | 216              |
| 4    | ENSG00000152822 | GRM1        | Metabotropic glutamate receptor 1 precursor                                                     | 4.69E-05 | 337              |
| 5    | ENSG00000118496 | FBXO30      | F-box only protein 30                                                                           | 7.26E-05 | 383              |
| 6    | ENSG00000152818 | UTRN        | Utrophin                                                                                        | 0.000155 | 494              |
| 7    | ENSG00000112414 | GPR126      | Probable G-protein coupled receptor 126 precursor                                               | 0.000342 | 680              |
| 8    | ENSG00000197081 | IGF2R       | Cation-independent mannose-6-phosphate receptor precursor                                       | 0.000455 | 745              |
| 9    | ENSG00000112038 | OPRM1       | Mu-type opioid receptor                                                                         | 0.002236 | 1386             |
| 10   | ENSG00000118495 | PLAGL1      | Zinc finger protein PLAGL1                                                                      | 0.003608 | 1669             |
| 11   | ENSG00000164440 | TXLNB       | Beta-taxilin                                                                                    | 0.00393  | 1722             |
| 12   | ENSG00000034693 | PEX3        | Peroxisomal biogenesis factor 3                                                                 | 0.004048 | 1746             |
| 13   | ENSG00000130338 | TULP4       | Tubby-related protein 4                                                                         | 0.008736 | 2368             |
| 14   | ENSG00000198729 | PPP1R14C    | Protein phosphatase 1 regulatory subunit 14C                                                    | 0.010421 | 2529             |
| 15   | ENSG00000112406 | HECA        | Headcase protein homolog                                                                        | 0.012274 | 2677             |
| 16   | ENSG00000112096 | SOD2        | Superoxide dismutase [Mn], mitochondrial precursor                                              | 0.013638 | 2805             |
| 17   | ENSG00000181472 | ZBTB2       | Zinc finger and BTB domain-containing protein 2                                                 | 0.013665 | 2811             |
| 18   | ENSG00000091831 | ESR1        | Estrogen receptor                                                                               | 0.016179 | 3030             |
| 19   | ENSG00000112031 | MTRF1L      | mitochondrial translational release factor 1-like                                               | 0.016263 | 3037             |
| 20   | ENSG00000146457 | WTAP        | Wilms' tumor 1-associating protein                                                              | 0.023454 | 3499             |
| 21   | ENSG00000175048 | ZDHHC14     | Probable palmitoyltransferase ZDHHC14                                                           | 0.023796 | 3521             |
| 22   | ENSG00000074706 | NP_056368.1 | phosphoinositide-binding protein PIP3-E                                                         | 0.025931 | 3629             |
| 23   | ENSG00000092820 | VIL2        | Ezrin                                                                                           | 0.027138 | 3703             |
| 24   | ENSG00000112029 | FBXO5       | F-box only protein 5                                                                            | 0.029822 | 3833             |
| 25   | ENSG00000120265 | PCMT1       | Protein-L-isoaspartate                                                                          | 0.032716 | 3983             |
| 26   | ENSG00000131018 | C6orf98     | Nesprin-1                                                                                       | 0.034277 | 4058             |
| 27   | ENSG00000112419 | PHACTR2     | Phosphatase and actin regulator 2                                                               | 0.043925 | 4418             |
| 28   | ENSG00000186625 | KATNA1      | Katanin p60 ATPase-containing subunit A1                                                        | 0.062688 | 5055             |
| 29   | ENSG00000185068 | GTF2H5      | TFIIH basal transcription factor complex TTD-A subunit                                          | 0.06391  | 5093             |
| 30   | ENSG00000146477 | SLC22A3     | Organic cation transporter 3                                                                    | 0.065952 | 5161             |
| 31   | ENSG00000111961 | SASH1       | SAM and SH3 domain-containing protein 1                                                         | 0.067992 | 5218             |
| 32   | ENSG00000164674 | SYTL3       | synaptotagmin-like 3                                                                            | 0.074042 | 5374             |
| 33   | ENSG00000009844 | VTA1        | Vacuolar protein sorting-associated protein VTA1 homolog                                        | 0.075066 | 5394             |
| 34   | ENSG00000120254 | MTHFD1L     | methylenetetrahydrofolate dehydrogenase                                                         | 0.076261 | 5422             |
| 35   | ENSG00000135604 | STX11       | Syntaxin-11                                                                                     | 0.094487 | 5888             |
| 36   | ENSG00000122335 | SERAC1      | Protein SERAC1                                                                                  | 0.095663 | 5914             |



|    |                 |          |                                                                        |          |       |
|----|-----------------|----------|------------------------------------------------------------------------|----------|-------|
| 37 | ENSG00000120438 | TCP1     | T-complex protein 1 subunit alpha                                      | 0.095825 | 5920  |
| 38 | ENSG00000029639 | TFB1M    | Mitochondrial dimethyladenosine transferase 1, mitochondrial precursor | 0.096437 | 5941  |
| 39 | ENSG00000120278 | PLEKHG1  | Pleckstrin homology domain-containing family G member 1                | 0.106406 | 6156  |
| 40 | ENSG00000112425 | EPM2A    | Laforin                                                                | 0.108274 | 6206  |
| 41 | ENSG00000055211 | C6orf72  | Uncharacterized protein C6orf72 precursor                              | 0.111094 | 6263  |
| 42 | ENSG00000146469 | VIP      | VIP peptides precursor                                                 | 0.113626 | 6332  |
| 43 | ENSG00000120279 | MYCT1    | myc target 1                                                           | 0.11487  | 6359  |
| 44 | ENSG00000091844 | RGS17    | Regulator of G-protein signaling 17                                    | 0.125839 | 6571  |
| 45 | ENSG00000078269 | SYNJ2    | Synaptojanin-2                                                         | 0.142887 | 6912  |
| 46 | ENSG00000146425 | DYNLT1   | Dynein light chain Tctex-type 1                                        | 0.170058 | 7438  |
| 47 | ENSG00000049618 | ARID1B   | AT-rich interactive domain-containing protein 1B                       | 0.171981 | 7475  |
| 48 | ENSG00000130340 | SNX9     | Sorting nexin-9                                                        | 0.174483 | 7516  |
| 49 | ENSG00000203711 | C6orf99  |                                                                        | 0.175808 | 7543  |
| 50 | ENSG00000203727 | SAMD5    | sterile alpha motif domain containing 5                                | 0.192814 | 7816  |
| 51 | ENSG00000135577 | NMBR     | Neuromedin-B receptor                                                  | 0.193228 | 7829  |
| 52 | ENSG00000131013 | PPIL4    | Peptidyl-prolyl cis-trans isomerase-like 4                             | 0.19765  | 7888  |
| 53 | ENSG00000112110 | MRPL18   | 39S ribosomal protein L18, mitochondrial precursor                     | 0.197794 | 7890  |
| 54 | ENSG00000001036 | FUCA2    | Plasma alpha-L-fucosidase precursor                                    | 0.223905 | 8276  |
| 55 | ENSG00000130363 | RSPH3    | radial spoke head 3 homolog                                            | 0.262823 | 8836  |
| 56 | ENSG00000153721 | CNKSR3   | CNKSR family member 3                                                  | 0.275909 | 9014  |
| 57 | ENSG00000164691 | TAGAP    | T-cell activation Rho GTPase-activating protein                        | 0.303527 | 9407  |
| 58 | ENSG00000131016 | AKAP12   | A-kinase anchor protein 12                                             | 0.316981 | 9559  |
| 59 | ENSG00000120256 | LRP11    | Low-density lipoprotein receptor-related protein 11 precursor.         | 0.331013 | 9721  |
| 60 | ENSG00000135597 | REPS1    | RalBP1-associated Eps domain-containing protein 1                      | 0.346337 | 9916  |
| 61 | ENSG00000146426 | TIAM2    | T-cell lymphoma invasion and metastasis 2 isoform b                    | 0.382258 | 10332 |
| 62 | ENSG00000009765 | IYD      | Iodotyrosine dehalogenase 1 precursor                                  | 0.382923 | 10341 |
| 63 | ENSG00000120437 | ACAT2    | Acetyl-CoA acetyltransferase, cytosolic                                | 0.39124  | 10449 |
| 64 | ENSG00000024862 | CCDC28A  | Coiled-coil domain-containing protein 28A                              | 0.395685 | 10507 |
| 65 | ENSG00000146386 | C6orf115 | Uncharacterized protein C6orf115.                                      | 0.440162 | 11033 |
| 66 | ENSG00000171217 | CLDN20   | Claudin-20.                                                            | 0.441675 | 11045 |
| 67 | ENSG00000146416 | AIG1     | Androgen-induced protein 1                                             | 0.446371 | 11101 |
| 68 | ENSG00000146453 | PNLDC1   | poly(A)-specific ribonuclease (PARN)-like domain containing 1          | 0.459979 | 11261 |
| 69 | ENSG00000135521 | LTV1     | LTV1 homolog                                                           | 0.47354  | 11422 |
| 70 | ENSG00000130368 | MAS1     | MAS proto-oncogene.                                                    | 0.572183 | 12591 |
| 71 | ENSG00000120253 | NUP43    | Nucleoporin Nup43                                                      | 0.578863 | 12683 |
| 72 | ENSG00000203725 |          |                                                                        | 0.598758 | 12917 |
| 73 | ENSG00000203734 | C6orf91  | Lung specific F-box and DH domain containing protein.                  | 0.604803 | 12989 |
| 74 | ENSG00000120262 | C6orf97  | Coiled coil-containing protein C6orf97.                                | 0.605512 | 12993 |
| 75 | ENSG00000203715 | Q6ZUJ7   | CDNA FLJ43649 fis, clone SYNOV4001326.                                 | 0.616374 | 13115 |
| 76 | ENSG00000203733 |          |                                                                        | 0.622915 | 13186 |
| 77 | ENSG00000111981 | ULBP1    | NKG2D ligand 1 precursor                                               | 0.673845 | 13760 |
| 78 | ENSG00000146433 | TMEM181  | Transmembrane protein 181.                                             | 0.723806 | 14369 |
| 79 | ENSG00000131023 | LATS1    | Serine/threonine-protein kinase LATS1                                  | 0.739113 | 14538 |
| 80 | ENSG00000164694 | FNDC1    | Fibronectin type III domain-containing                                 | 0.746304 | 14644 |

| protein 1 |                 |           |                                                          |          |       |
|-----------|-----------------|-----------|----------------------------------------------------------|----------|-------|
| 81        | ENSG00000164506 | STXBP5    | Syntaxin-binding protein 5                               | 0.774888 | 15036 |
| 82        | ENSG00000146414 | SHPRH     | E3 ubiquitin-protein ligase SHPRH                        | 0.800801 | 15387 |
| 83        | ENSG00000155906 | RMND1     | Required for meiotic nuclear division protein 1 homolog. | 0.808266 | 15510 |
| 84        | ENSG00000112499 | SLC22A2   | solute carrier family 22 member 2                        | 0.820311 | 15698 |
| 85        | ENSG00000189007 | ADAT2     | tRNA-specific adenosine deaminase 2                      | 0.828169 | 15815 |
| 86        | ENSG00000118492 | C6orf103  | Uncharacterized protein C6orf103.                        | 0.828857 | 15826 |
| 87        | ENSG00000169976 | SF3B5     | Splicing factor 3B subunit 5                             | 0.834561 | 15912 |
| 88        | ENSG00000146476 | C6orf211  | UPF0364 protein C6orf211.                                | 0.853991 | 16254 |
| 89        | ENSG00000177688 | SUMO4     | Small ubiquitin-related modifier 4 precursor             | 0.857203 | 16315 |
| 90        | ENSG00000122339 | C6orf35   | CDNA FLJ10029 fis, clone HEMBA1000817                    | 0.887182 | 16911 |
| 91        | ENSG00000118508 | RAB32     | Ras-related protein Rab-32.                              | 0.89588  | 17112 |
| 92        | ENSG00000074771 | NOX3      | NADPH oxidase 3                                          | 0.90021  | 17220 |
| 93        | ENSG00000131015 | ULBP2     | NKG2D ligand 2 precursor                                 | 0.912752 | 17524 |
| 94        | ENSG00000131019 | ULBP3     | NKG2D ligand 3 precursor                                 | 0.940166 | 18306 |
| 95        | ENSG00000111962 | UST       | Uronyl 2-sulfotransferase                                | 0.949789 | 18691 |
| 96        | ENSG00000198670 | LPA       | Apolipoprotein                                           | 0.955294 | 18926 |
| 97        | ENSG00000118491 | C6orf94   | UPF0418 protein C6orf94.                                 | 0.964293 | 19332 |
| 98        | ENSG00000164520 | RAET1E    | NKG2D ligand 4 precursor                                 | 0.970816 | 19698 |
| 99        | ENSG00000175003 | SLC22A1   | solute carrier family 22 member 1 isoform b              | 0.971006 | 19713 |
| 100       | ENSG00000164711 | LPAL2     | Lipoprotein Lp                                           | 0.974121 | 19894 |
| 101       | ENSG00000155918 | RAET1L    | retinoic acid early transcript 1L                        | 0.984489 | 20777 |
| 102       | ENSG00000203722 | RAET1G    | Retinoic acid early transcript 1G protein precursor.     | 0.988129 | 21198 |
| 103       | ENSG00000178199 | ZC3H12D   | zinc finger CCCH-type containing 12D                     | 0.991595 | 21785 |
| 104       | ENSG00000196492 | NM_207500 | CDNA FLJ44955 fis, clone BRAWH2010619                    | 0.993465 | 22221 |
| 105       | ENSG00000198213 | NM_207501 | CDNA FLJ27255 fis, clone SYN09519.                       | 0.994379 | 22468 |

TABLE S5. TRAINING SETS FOR GENE PRIORITISATION

| Ensembl Gene ID                           | HGNC symbol | Description                                                       |
|-------------------------------------------|-------------|-------------------------------------------------------------------|
| <b>vascularisation</b>                    |             |                                                                   |
| ENSG00000004399                           | PLXND1      | Plexin-D1 Precursor                                               |
| ENSG00000074181                           | NOTCH3      | Neurogenic locus notch homolog protein 3 Precursor                |
| ENSG00000075213                           | SEMA3A      | Semaphorin-3A Precursor                                           |
| ENSG00000075223                           | SEMA3C      | Semaphorin-3C Precursor                                           |
| ENSG00000078401                           | EDN1        | Endothelin-1 Precursor                                            |
| ENSG00000099250                           | NRP1        | Neuropilin-1 Precursor                                            |
| ENSG00000105329                           | TGFB1       | Transforming growth factor beta-1 Precursor                       |
| ENSG00000106799                           | TGFBR1      | TGF-beta receptor type-1 Precursor                                |
| ENSG00000106991                           | ENG         | Endoglin Precursor                                                |
| ENSG00000112715                           | VEGFA       | Vascular endothelial growth factor A Precursor                    |
| ENSG00000120156                           | TEK         | Angiopoietin-1 receptor Precursor                                 |
| ENSG00000125845                           | BMP2        | Bone morphogenetic protein 2 Precursor                            |
| ENSG00000134250                           | NOTCH2      | Neurogenic locus notch homolog protein 2 Precursor                |
| ENSG00000137834                           | SMAD6       | Mothers against decapentaplegic homolog 6                         |
| ENSG00000148400                           | NOTCH1      | Neurogenic locus notch homolog protein 1 Precursor                |
| ENSG00000154188                           | ANGPT1      | Angiopoietin-1 Precursor                                          |
| ENSG00000162692                           | VCAM1       | Vascular cell adhesion protein 1 Precursor                        |
| ENSG00000163513                           | TGFBR2      | TGF-beta receptor type-2 Precursor                                |
| ENSG00000170381                           | SEMA3E      | Semaphorin-3E Precursor                                           |
| ENSG00000185551                           | NR2F2       | COUP transcription factor 2                                       |
| <b>left-right asymmetry establishment</b> |             |                                                                   |
| ENSG00000105877                           | DNAH11      | Dynein heavy chain 11, axonemal                                   |
| ENSG00000114739                           | ACVR2B      | Activin receptor type-2B Precursor                                |
| ENSG00000124181                           | PLCG1       | 1-phosphatidylinositol-4,5-bisphosphate phosphodiesterase gamma-1 |
| ENSG00000125378                           | BMP4        | Bone morphogenetic protein 4 Precursor                            |
| ENSG00000136698                           | CFC1        | Cryptic protein Precursor                                         |
| ENSG00000143768                           | LEFTY2      | Left-right determination factor 2 Precursor                       |
| ENSG00000156574                           | NODAL       | Nodal homolog Precursor                                           |
| ENSG00000156925                           | ZIC3        | Zinc finger protein ZIC 3                                         |
| ENSG00000164093                           | PITX2       | Pituitary homeobox 2                                              |
| ENSG00000164442                           | CITED2      | Cbp/p300-interacting transactivator 2                             |
| ENSG00000164690                           | SHH         | Sonic hedgehog protein Precursor                                  |
| <b>human CHDs</b>                         |             |                                                                   |
| ENSG00000008196                           | TFAP2B      | Transcription factor AP-2 beta                                    |
| ENSG00000072840                           | EVC         | Ellis-van Creveld syndrome protein                                |
| ENSG00000085224                           | ATRX        | Transcriptional regulator ATRX                                    |
| ENSG00000089225                           | TBX5        | T-box transcription factor TBX5                                   |
| ENSG00000101384                           | JAG1        | Protein jagged-1 Precursor                                        |
| ENSG00000101871                           | MID1        | Midline-1                                                         |
| ENSG00000106799                           | TGFBR1      | TGF-beta receptor type-1 Precursor                                |
| ENSG00000114739                           | ACVR2B      | Activin receptor type-2B Precursor                                |
| ENSG00000115904                           | SOS1        | Son of sevenless homolog 1                                        |
| ENSG00000123066                           | MED13L      | Mediator of RNA polymerase II transcription subunit 13-like       |
| ENSG00000126934                           | MAP2K2      | Dual specificity mitogen-activated protein kinase kinase 2        |
| ENSG00000133703                           | KRAS        | GTPase KRas Precursor                                             |
| ENSG00000136574                           | GATA4       | Transcription factor GATA-4                                       |
| ENSG00000136698                           | CFC1        | Cryptic protein Precursor                                         |
| ENSG00000138829                           | FBN2        | Fibrillin-2 Precursor                                             |

|                           |         |                                                                 |
|---------------------------|---------|-----------------------------------------------------------------|
| ENSG00000143768           | LEFTY2  | Left-right determination factor 2 Precursor                     |
| ENSG00000148400           | NOTCH1  | Neurogenic locus notch homolog protein 1 Precursor              |
| ENSG00000156925           | ZIC3    | Zinc finger protein ZIC 3                                       |
| ENSG00000157764           | BRAF    | B-Raf proto-oncogene serine/threonine-protein kinase            |
| ENSG00000163513           | TGFBR2  | TGF-beta receptor type-2 Precursor                              |
| ENSG00000163703           | CRELD1  | Cysteine-rich with EGF-like domain protein 1 Precursor          |
| ENSG00000164442           | CITED2  | Cbp/p300-interacting transactivator 2                           |
| ENSG00000169032           | MAP2K1  | Dual specificity mitogen-activated protein kinase kinase 1      |
| ENSG00000169554           | ZEB2    | Zinc finger E-box-binding homeobox 2                            |
| ENSG00000169946           | ZFPM2   | Zinc finger protein ZFPM2                                       |
| ENSG00000170381           | SEMA3E  | Semaphorin-3E Precursor                                         |
| ENSG00000171316           | CHD7    | Chromodomain-helicase-DNA-binding protein 7                     |
| ENSG00000174775           | HRAS    | GTPase HRas Precursor                                           |
| ENSG00000175206           | NPPA    | Atrial natriuretic factor Precursor                             |
| ENSG00000179295           | PTPN11  | Tyrosine-protein phosphatase non-receptor type 11               |
| ENSG00000181090           | EHMT1   | Histone-lysine N-methyltransferase, H3 lysine-9 specific 5      |
| ENSG00000183072           | NKX2-5  | Homeobox protein Nkx-2.5                                        |
| ENSG00000184058           | TBX1    | T-box transcription factor TBX1                                 |
| <b>neural crest cells</b> |         |                                                                 |
| ENSG00000004975           | DVL2    | Segment polarity protein dishevelled homolog DVL-2              |
| ENSG00000006377           | DLX6    | Homeobox protein DLX-6                                          |
| ENSG000000054598          | FOXC1   | Forkhead box protein C1                                         |
| ENSG000000070010          | UFD1L   | Ubiquitin fusion degradation protein 1 homolog                  |
| ENSG000000076356          | PLXNA2  | Plexin-A2 Precursor                                             |
| ENSG000000077092          | RARB    | Retinoic acid receptor beta                                     |
| ENSG000000087245          | MMP2    | 72 kDa type IV collagenase Precursor                            |
| ENSG000000099942          | CRKL    | Crk-like protein                                                |
| ENSG00000100027           | YPEL1   | Protein yippee-like 1                                           |
| ENSG00000100084           | HIRA    | Protein HIRA                                                    |
| ENSG00000101384           | JAG1    | Protein jagged-1 Precursor                                      |
| ENSG00000105329           | TGFB1   | Transforming growth factor beta-1 Precursor                     |
| ENSG00000107779           | BMPRI1A | Bone morphogenetic protein receptor type-1A Precursor           |
| ENSG00000107831           | FGF8    | Fibroblast growth factor 8 Precursor                            |
| ENSG00000108557           | RAI1    | Retinoic acid-induced protein 1                                 |
| ENSG00000112715           | VEGFA   | Vascular endothelial growth factor A Precursor                  |
| ENSG00000115170           | ACVR1   | Activin receptor type-1 Precursor                               |
| ENSG00000118257           | NRP2    | Neuropilin-2 Precursor                                          |
| ENSG00000120149           | MSX2    | Homeobox protein MSX-2                                          |
| ENSG00000125084           | WNT1    | Proto-oncogene protein Wnt-1 Precursor                          |
| ENSG00000131759           | RARA    | Retinoic acid receptor alpha                                    |
| ENSG00000135503           | ACVR1B  | Activin receptor type-1B Precursor                              |
| ENSG00000135547           | HEY2    | Hairy/enhancer-of-split related with YRPW motif protein 2       |
| ENSG00000135903           | PAX3    | Paired box protein Pax-3                                        |
| ENSG00000138136           | LBX1    | Transcription factor LBX1                                       |
| ENSG00000141448           | GATA6   | Transcription factor GATA-6                                     |
| ENSG00000143171           | RXRG    | Retinoic acid receptor RXR-gamma                                |
| ENSG00000146457           | WTAP    | Pre-mRNA-splicing regulator WTAP                                |
| ENSG00000148400           | NOTCH1  | Neurogenic locus notch homolog protein 1 Precursor              |
| ENSG00000151617           | EDNRA   | Endothelin-1 receptor Precursor                                 |
| ENSG00000152661           | GJA1    | Gap junction alpha-1 protein                                    |
| ENSG00000164442           | CITED2  | Cbp/p300-interacting transactivator 2                           |
| ENSG00000169756           | LIMS1   | LIM and senescent cell antigen-like-containing domain protein 1 |

|                           |        |                                                                          |
|---------------------------|--------|--------------------------------------------------------------------------|
| ENSG00000170381           | SEMA3E | Semaphorin-3E Precursor                                                  |
| ENSG00000171316           | CHD7   | Chromodomain-helicase-DNA-binding protein 7                              |
| ENSG00000176692           | FOXC2  | Forkhead box protein C2                                                  |
| ENSG00000178568           | ERBB4  | Receptor tyrosine-protein kinase erbB-4 Precursor                        |
| ENSG00000185652           | NTF3   | Neurotrophin-3 Precursor                                                 |
| ENSG00000186260           | MKL2   | MKL/myocardin-like protein 2                                             |
| ENSG00000186350           | RXRA   | Retinoic acid receptor RXR-alpha                                         |
| ENSG00000197461           | PDGFA  | Platelet-derived growth factor subunit A Precursor                       |
| ENSG00000204231           | RXRB   | Retinoic acid receptor RXR-beta                                          |
| <b>first heart field</b>  |        |                                                                          |
| ENSG00000081189           | MEF2C  | Myocyte-specific enhancer factor 2C                                      |
| ENSG00000089225           | TBX5   | T-box transcription factor TBX5                                          |
| ENSG00000113196           | HAND1  | Heart- and neural crest derivatives-expressed protein 1                  |
| ENSG00000134817           | APLNR  | Apelin receptor                                                          |
| ENSG00000136574           | GATA4  | Transcription factor GATA-4                                              |
| ENSG00000141052           | MYOCD  | Myocardin                                                                |
| ENSG00000163217           | BMP10  | Bone morphogenetic protein 10 Precursor                                  |
| ENSG00000164107           | HAND2  | Heart- and neural crest derivatives-expressed protein 2                  |
| ENSG00000164532           | TBX20  | T-box transcription factor TBX20                                         |
| ENSG00000169946           | ZFPM2  | Zinc finger protein ZFPM2                                                |
| ENSG00000171388           | APLN   | Apelin Precursor                                                         |
| ENSG00000183072           | NKX2-5 | Homeobox protein Nkx-2.5                                                 |
| <b>second heart field</b> |        |                                                                          |
| ENSG00000016082           | ISL1   | Insulin gene enhancer protein ISL-1                                      |
| ENSG00000070193           | FGF10  | Fibroblast growth factor 10 Precursor                                    |
| ENSG00000081189           | MEF2C  | Myocyte-specific enhancer factor 2C                                      |
| ENSG00000100027           | YPEL1  | Protein yippee-like 1                                                    |
| ENSG00000107831           | FGF8   | Fibroblast growth factor 8 Precursor                                     |
| ENSG00000113196           | HAND1  | Heart- and neural crest derivatives-expressed protein 1                  |
| ENSG00000160973           | FOXH1  | Forkhead box protein H1                                                  |
| ENSG00000164093           | PITX2  | Pituitary homeobox 2                                                     |
| ENSG00000164107           | HAND2  | Heart- and neural crest derivatives-expressed protein 2                  |
| ENSG00000164532           | TBX20  | T-box transcription factor TBX20                                         |
| <b>valve development</b>  |        |                                                                          |
| ENSG00000038427           | VCAN   | Versican core protein Precursor                                          |
| ENSG00000101384           | JAG1   | Protein jagged-1 Precursor                                               |
| ENSG00000106991           | ENG    | Endoglin Precursor                                                       |
| ENSG00000115170           | ACVR1  | Activin receptor type-1 Precursor                                        |
| ENSG00000125398           | SOX9   | Transcription factor SOX-9                                               |
| ENSG00000131196           | NFATC1 | Nuclear factor of activated T-cells, cytoplasmic 1                       |
| ENSG00000135074           | ADAM19 | Disintegrin and metalloproteinase domain-containing protein 19 Precursor |
| ENSG00000143387           | CTSK   | Cathepsin K Precursor                                                    |
| ENSG00000148400           | NOTCH1 | Neurogenic locus notch homolog protein 1 Precursor                       |
| ENSG00000163513           | TGFBR2 | TGF-beta receptor type-2 Precursor                                       |
| ENSG00000166147           | FBN1   | Fibrillin-1 Precursor                                                    |
| ENSG00000171316           | CHD7   | Chromodomain-helicase-DNA-binding protein 7                              |
| ENSG00000183337           | BCOR   | BCL-6 corepressor                                                        |
